# Supplementary material for: Associations between the COVID-19 Pandemic and Hospital Infrastructure Adaptation and Planning—A Scoping Review
Source: MDPI journal article supplement (doi:10.3390/ijerph19138195), 2022-07-04
Supplement: s1 [file s1]

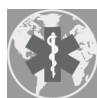

## Supplementary Materials

**Table S1.** Lists the organizations' websites that were consulted, along with their addresses and dates of access.

| Name of the organization                                                  | Address of the website                                                                                                                                                                                                                                                      | Access date |
|---------------------------------------------------------------------------|-----------------------------------------------------------------------------------------------------------------------------------------------------------------------------------------------------------------------------------------------------------------------------|-------------|
| ▪ Organisation for Economic Co-operation and Development (OECD)           | <a href="https://www.oecd.org/">https://www.oecd.org/</a>                                                                                                                                                                                                                   | 15/03/2022  |
| ▪ The World Bank                                                          | <a href="https://www.worldbank.org/en/home">https://www.worldbank.org/en/home</a>                                                                                                                                                                                           | 15/03/2022  |
| ▪ European Observatory on Health Systems and Policies                     | <a href="https://eurohealthobservatory.who.int/home">https://eurohealthobservatory.who.int/home</a>                                                                                                                                                                         | 15/03/2022  |
| ▪ European Commission                                                     | <a href="https://ec.europa.eu/info/index_en">https://ec.europa.eu/info/index_en</a>                                                                                                                                                                                         | 16/03/2022  |
| ▪ U.S. Centres for Medicare & Medicaid                                    | <a href="https://www.cms.gov/newsroom/press-releases/cms-announces-comprehensive-strategy-enhance-hospital-capacity-amid-covid-19-surge">https://www.cms.gov/newsroom/press-releases/cms-announces-comprehensive-strategy-enhance-hospital-capacity-amid-covid-19-surge</a> | 14/03/2022  |
| ▪ World Health Organization (WHO)                                         | <a href="https://www.who.int/health-topics/hospitals#tab=tab_1">https://www.who.int/health-topics/hospitals#tab=tab_1</a>                                                                                                                                                   | 14/03/2022  |
| ▪ American Hospital Association (AHA)                                     | <a href="https://www.aha.org/fact-sheets/2021-05-26-fact-sheet-ensuring-hospital-infrastructure-meets-nations-needs-today-and">https://www.aha.org/fact-sheets/2021-05-26-fact-sheet-ensuring-hospital-infrastructure-meets-nations-needs-today-and</a>                     | 14/03/2022  |
| ▪ American Society for Health Care Engineering (ASHE)                     | <a href="https://www.hfmmagazine.com/articles/4329-designing-the-post-pandemic-hospital">https://www.hfmmagazine.com/articles/4329-designing-the-post-pandemic-hospital</a>                                                                                                 | 16/03/2022  |
| ▪ Centre for Disease Control and Prevention (CDC)                         | <a href="https://www.cdc.gov/nhsn/covid19/report-patient-impact.html">https://www.cdc.gov/nhsn/covid19/report-patient-impact.html</a>                                                                                                                                       | 16/03/2022  |
| ▪ European Hospital & Healthcare Federation (hope)                        | <a href="https://hope.be/">https://hope.be/</a>                                                                                                                                                                                                                             | 16/03/2022  |
| ▪ Association of Schools of Public Health in the European Region (ASPHER) | <a href="https://www.aspher.org/covid-19-situation-reporting.html">https://www.aspher.org/covid-19-situation-reporting.html</a>                                                                                                                                             | 16/03/2022  |
| ▪ Omnia health                                                            | <a href="https://insights.omnia-health.com/management/building-health-centres-future">https://insights.omnia-health.com/management/building-health-centres-future</a>                                                                                                       | 16/03/2022  |

**Table S2:** Data extraction format for empirical papers

| Research question (RQ)                                                                                                                                                               | Data extracted                                                                                                                                                                     | Coding examples                                                                                                                                                                                                                                  |
|--------------------------------------------------------------------------------------------------------------------------------------------------------------------------------------|------------------------------------------------------------------------------------------------------------------------------------------------------------------------------------|--------------------------------------------------------------------------------------------------------------------------------------------------------------------------------------------------------------------------------------------------|
| <b>RQ1:</b> What were the general characteristics of the study (authorship/title; date of publication; studies focused on specific countries or with a regional or global approach)? | <ul style="list-style-type: none"> <li>▪ Authors</li> <li>✓ Acronym</li> <li>✓ Full reference</li> <li>▪ Title</li> <li>▪ Date of publication</li> <li>▪ Research place</li> </ul> | <ul style="list-style-type: none"> <li>• N/A</li> <li>• Author(year)</li> <li>• N/A</li> <li>• N/A</li> <li>• Year and month: e.g.: 2019 June → 2019/06</li> <li>• 1_ research in one country (specify the country); 2_ multi country</li> </ul> |

|                                                                                                                      |                                                                                                                                                                                 |                                                                                                                                                                                                                                                                                                                                                                                                                                                                                                                        |
|----------------------------------------------------------------------------------------------------------------------|---------------------------------------------------------------------------------------------------------------------------------------------------------------------------------|------------------------------------------------------------------------------------------------------------------------------------------------------------------------------------------------------------------------------------------------------------------------------------------------------------------------------------------------------------------------------------------------------------------------------------------------------------------------------------------------------------------------|
|                                                                                                                      |                                                                                                                                                                                 | in same continent; 3_ multi country in different continents (international); 4_no information on research country                                                                                                                                                                                                                                                                                                                                                                                                      |
| <b>RQ2:</b> What design was the study?                                                                               | <ul style="list-style-type: none"> <li>▪ Research design</li> <li>▪ Period of the study</li> <li>▪ Sample</li> <li>▪ Type of hospital</li> <li>▪ Number of hospitals</li> </ul> | <ul style="list-style-type: none"> <li>• Qt_Quantitative: QtL_longitudinal; Qtc_cross-sectional; Qtm_modelling)</li> <li>• Ql_Qualitative</li> <li>• Mx_Mix</li> <li>• From (MM/YYYY) to (MM/YYYY) e.g., 01/2019 - 04/2019</li> <li>• M_Multicountry; N_national; R_regional; L_local; H1_case study based on 1 hospital only</li> <li>• GH_general hospital, SH_specialised hospital, UH_university (teaching) hospital, NH_hospital not specified</li> <li>• Number, e.g.,5</li> <li>• Not specified (NS)</li> </ul> |
| <b>RQ3:</b> What was (were) the objective(s)/type of association(s) being evaluated?                                 | <ul style="list-style-type: none"> <li>▪ Study objective (type of association being assessed)</li> </ul>                                                                        | <ul style="list-style-type: none"> <li>• Impact of the COVID pandemic on the hospital infrastructure (COVID → hospitals)</li> <li>• Association between COVID management and available infrastructure, e.g., mortality vs ICU beds (hospitals → COVID)</li> <li>• Modelling studies on number of beds needed (hospital → bed prediction)</li> </ul>                                                                                                                                                                    |
| <b>RQ4:</b> What was (were) the solution(s) or adaptation(s) or conceptual/theoretical framework(s)/planning stated? | <ul style="list-style-type: none"> <li>▪ Study results/conclusions (solution/ conceptual/theoretical framework)</li> </ul>                                                      | <ul style="list-style-type: none"> <li>• ST_ (short-term solutions) Adaptation:</li> <li>• ST1_Temporary facilities: e.g., Mobile makeshifts, field hospitals, etc; ST2_Repurposing non-clinical/non-medical buildings: e.g., training centers, malls, schools; ST3_Repurposing existing clinical/medical buildings, e.g, converting pediatric rooms into ICU beds); ST4_Remote strategies: e.g., remote triage via websites, call centers, etc;</li> </ul>                                                            |

|                                    |                                                                        |                                                                                                                                                                                                              |
|------------------------------------|------------------------------------------------------------------------|--------------------------------------------------------------------------------------------------------------------------------------------------------------------------------------------------------------|
|                                    |                                                                        | <ul style="list-style-type: none"> <li>• LT_(long-term-solutions) Planning:</li> <li>• LT1_Architecture, LT2_Engineering, LT3_Construction (builders), LTO_other hospital infrastructure planning</li> </ul> |
| RQ5: What limitations were stated? | <ul style="list-style-type: none"> <li>▪ Limitations stated</li> </ul> | <ul style="list-style-type: none"> <li>• Related to data</li> <li>• Related to methods</li> <li>• Not stated</li> </ul>                                                                                      |

**Table S3. Search Results in PubMed**

| PubMed Search strategy                                                                                                                                                                                      |                                                                                                                                                                                                                                                                                                             |                 |
|-------------------------------------------------------------------------------------------------------------------------------------------------------------------------------------------------------------|-------------------------------------------------------------------------------------------------------------------------------------------------------------------------------------------------------------------------------------------------------------------------------------------------------------|-----------------|
| Database: MEDLINE via PubMed                                                                                                                                                                                |                                                                                                                                                                                                                                                                                                             |                 |
| Steps: <ul style="list-style-type: none"> <li>• Step1: #1</li> <li>• Step2: #2</li> <li>• Step3: #1 AND #2</li> <li>• Step4: #1 AND #2 AND filters (Full text, English language, from 2019-2021)</li> </ul> |                                                                                                                                                                                                                                                                                                             |                 |
| #1                                                                                                                                                                                                          | Search: "Hospital infrastructure"[Title/Abstract] OR "hospital capacit*[Title/Abstract] OR "hospital equipment"[Title/Abstract] OR "hospital bed"[Title/Abstract] OR "hospital plan"[Title/Abstract]                                                                                                        | 6,831 Results   |
| #2                                                                                                                                                                                                          | Search: "COVID-19"[Title/Abstract] OR "Sars-Cov-2"[Title/Abstract] OR "Coronavirus"[Title/Abstract] OR "pandemic"[Title/Abstract]                                                                                                                                                                           | 243,785 Results |
| #1 AND #2                                                                                                                                                                                                   | Search: ("Hospital infrastructure"[Title/Abstract] OR "hospital capacit*[Title/Abstract] OR "hospital equipment"[Title/Abstract] OR "hospital bed"[Title/Abstract] OR "hospital plan"[Title/Abstract]) AND (COVID* OR Sars-Cov-2 OR Coronavirus OR pandemic*)                                               | 562 Results     |
| #1 AND #2 AND filters                                                                                                                                                                                       | Search: ("Hospital infrastructure"[Title/Abstract] OR "hospital capacit*[Title/Abstract] OR "hospital equipment"[Title/Abstract] OR "hospital bed"[Title/Abstract] OR "hospital plan"[Title/Abstract]) AND (COVID* OR Sars-Cov-2 OR Coronavirus OR pandemic*) Filters: Full text, English, from 2019 - 2021 | 489 Results     |

**Table S4. Search Results in Scopus**

| Scopus Search strategy                                                                    |  |
|-------------------------------------------------------------------------------------------|--|
| Database: Scopus                                                                          |  |
| Steps: <ul style="list-style-type: none"> <li>• Step1: #1</li> <li>• Step2: #2</li> </ul> |  |

|                                                                                                                                                        |                                                                                                                                                                                                                                                                                                                                                                                                  |                                |
|--------------------------------------------------------------------------------------------------------------------------------------------------------|--------------------------------------------------------------------------------------------------------------------------------------------------------------------------------------------------------------------------------------------------------------------------------------------------------------------------------------------------------------------------------------------------|--------------------------------|
| <ul style="list-style-type: none"> <li>Step3: #1 AND #2</li> <li>Step4: #1 AND #2 AND filters (Full text, English language, from 2019-2021)</li> </ul> |                                                                                                                                                                                                                                                                                                                                                                                                  |                                |
| #1                                                                                                                                                     | TITLE-ABS-KEY ( "Hospital infrastrucur*" OR "hospital capacit*" OR "hospital equipment*" OR "hospital bed*" OR "hospital plan*" )                                                                                                                                                                                                                                                                | 53,063<br>document<br>results  |
| #2                                                                                                                                                     | TITLE-ABS-KEY (COVID-19 OR sars-cov-2 OR coronavirus OR pandemic* )                                                                                                                                                                                                                                                                                                                              | 330,602<br>document<br>results |
| #1 AND #2                                                                                                                                              | ( TITLE-ABS-KEY ( "Hospital infrastrucur*" OR "hospital capacit*" OR "hospital equipment*" OR "hospital bed*" OR "hospital plan*" ) ) AND ( TITLE-ABS-KEY ( covid* OR sars-cov-2 OR coronavirus OR pandemic* ) )                                                                                                                                                                                 | 1,504<br>document<br>results   |
| #1 AND #2<br>AND filters                                                                                                                               | ( TITLE-ABS-KEY ( "Hospital infrastrucur*" OR "hospital capacit*" OR "hospital equipment*" OR "hospital bed*" OR "hospital plan*" ) ) AND ( TITLE-ABS-KEY ( covid* OR sars-cov-2 OR coronavirus OR pandemic* ) ) AND ( LIMIT-TO ( PUBYEAR , 2021 ) OR LIMIT-TO ( PUBYEAR , 2020 ) OR LIMIT-TO ( PUBYEAR , 2019 ) ) AND ( LIMIT-TO ( DOCTYPE , "ar" ) ) AND ( LIMIT-TO ( LANGUAGE , "English" ) ) | 787<br>document<br>results     |

**Table S5. Search Results in Web of Science**

| Web of Science Search strategy                                                                                                                                                                      |                                                                                                                                                                                                                                                |                                 |
|-----------------------------------------------------------------------------------------------------------------------------------------------------------------------------------------------------|------------------------------------------------------------------------------------------------------------------------------------------------------------------------------------------------------------------------------------------------|---------------------------------|
| Database: Web of Science                                                                                                                                                                            |                                                                                                                                                                                                                                                |                                 |
| Steps: <ul style="list-style-type: none"> <li>Step1: #1</li> <li>Step2: #2</li> <li>Step3: #1 AND #2</li> <li>Step4: #1 AND #2 AND filters (Full text, English language, from 2019-2021)</li> </ul> |                                                                                                                                                                                                                                                |                                 |
| 1                                                                                                                                                                                                   | (TI=("Hospital infrastrucur*" OR "hospital capacit*" OR "hospital equipment*" OR "hospital bed*" OR "hospital plan*")) OR AB=("Hospital infrastrucur*" OR "hospital capacit*" OR "hospital equipment*" OR "hospital bed*" OR "hospital plan*") | 4,816 <a href="#">results</a>   |
| 2                                                                                                                                                                                                   | (TI=(COVID* OR Sars-Cov-2 OR Coronavirus OR pandemic*)) OR AB=(COVID* OR Sars-Cov-2 OR Coronavirus OR pandemic*)                                                                                                                               | 274,073 <a href="#">results</a> |
| 3                                                                                                                                                                                                   | #1 AND #2                                                                                                                                                                                                                                      | 517 <a href="#">results</a>     |
| 4                                                                                                                                                                                                   | #1 AND #2 and 2019 or 2020 or 2021 (Publication Years) and Articles (Document Types) and English (Languages)                                                                                                                                   | 391 <a href="#">results</a>     |

**Table S6: All 106 studies included**

| Study No | Acronym | Full reference | Type of publication |
|----------|---------|----------------|---------------------|
|----------|---------|----------------|---------------------|

|   |                                   |                                                                                                                                                                                                                                                                                                                           |                                     |
|---|-----------------------------------|---------------------------------------------------------------------------------------------------------------------------------------------------------------------------------------------------------------------------------------------------------------------------------------------------------------------------|-------------------------------------|
| 1 | Capolongo, S. et al. (2020)       | Capolongo, S. et al. (2020) 'COVID-19 and Healthcare Facilities: a Decalogue of Design Strategies for Resilient Hospitals.', <i>Acta bio-medica: Atenei Parmensis</i> , 91(9-S), pp. 50–60. doi: 10.23750/abm.v91i9-S.10117.                                                                                              | Multicountry non-modelling          |
| 2 | Louri, N. A. et al. (2021)        | Louri, N. A. et al. (2021) 'Establishing a 130-Bed Field Intensive Care Unit to Prepare for COVID-19 in 7 Days in Bahrain Military Hospital', <i>Disaster Medicine and Public Health Preparedness</i> , 15(1), pp. e34–e43. doi: 10.1017/dmp.2020.297.                                                                    | Singlecountry non-modelling         |
| 3 | Lefrant, J.-Y. et al. (2020)      | Lefrant, J.-Y. et al. (2020) 'A national healthcare response to intensive care bed requirements during the COVID-19 outbreak in France', <i>Anaesthesia Critical Care and Pain Medicine</i> , 39(6), pp. 709–715. doi: 10.1016/j.accpm.2020.09.007.                                                                       | Singlecountry non-modelling         |
| 4 | Fang, D. et al. (2020)            | Fang, D. et al. (2020) 'Large-scale public venues as medical emergency sites in disasters: Lessons from COVID-19 and the use of Fangcang shelter hospitals in Wuhan, China', <i>BMJ Global Health</i> , 5(6), pp. 1–7. doi: 10.1136/bmjgh-2020-002815.                                                                    | Singlecountry non-modelling         |
| 5 | Arabi, Y. M. et al. (2021)        | Arabi, Y. M. et al. (2021) 'How the COVID-19 pandemic will change the future of critical care', <i>Intensive Care Medicine</i> , 47(3), pp. 282–291. doi: 10.1007/s00134-021-06352-y.                                                                                                                                     | Singlecountry non-modelling         |
| 6 | Tadavarthy, S. N. et al. (2021)   | Tadavarthy, S. N. et al. (2021) 'Developing and implementing an infection prevention and control program for a COVID-19 alternative care site in Philadelphia, PA', <i>American Journal of Infection Control</i> , 49(1), pp. 77–81. doi: 10.1016/j.ajic.2020.07.006                                                      | Singlecountry non-modelling         |
| 7 | Hickey, S. et al. (2020)          | Hickey, S. et al. (2020) 'Rapid deployment of an emergency department-intensive care unit for the COVID-19 pandemic', <i>Clinical and Experimental Emergency Medicine</i> , 7(4), pp. 319–325.                                                                                                                            | Singlecountry non-modelling         |
| 8 | Emmanuel, U. et al. (2020)        | Emmanuel, U., Osondu, E. D. and Kalu, K. C. (2020) 'Architectural design strategies for infection prevention and control (IPC) in health-care facilities: towards curbing the spread of Covid-19', <i>Journal of Environmental Health Science and Engineering</i> , 18(2), pp. 1699–1707.                                 | Country-not-specified non-modelling |
| 9 | Akuamoa-Boateng, D. et al. (2020) | Akuamoa-Boateng, D. et al. (2020) 'Managing patient flows in radiation oncology during the COVID-19 pandemic: Reworking existing treatment designs to prevent infections at a German hot spot area University Hospital', <i>Strahlentherapie und Onkologie</i> , 196(12), pp. 1080–1085. doi: 10.1007/s00066-020-01698-6. | Singlecountry non-modelling         |

|    |                               |                                                                                                                                                                                                                                                         |                                     |
|----|-------------------------------|---------------------------------------------------------------------------------------------------------------------------------------------------------------------------------------------------------------------------------------------------------|-------------------------------------|
| 10 | Whiteside, T. et al. (2020)   | Whiteside, T. et al. (2020) 'Redesigning emergency department operations amidst a viral pandemic', <i>American Journal of Emergency Medicine</i> , 38(7), pp. 1448–1453. doi: 10.1016/j.ajem.2020.04.032.                                               | Singlecountry non-modelling         |
| 11 | Lacasa, L. et al. (2020)      | Lacasa, L. et al. (2020) 'A flexible method for optimising sharing of healthcare resources and demand in the context of the COVID-19 pandemic', <i>PLoS ONE</i> , 15(10 October). doi: 10.1371/journal.pone.0241027.                                    | Singlecountry non-modelling         |
| 12 | Al-Dorzi, H. M. et al. (2021) | Al-Dorzi, H. M. et al. (2021) 'Managing critical care during COVID-19 pandemic: The experience of an ICU of a tertiary care hospital.', <i>Journal of infection and public health</i> , 14(11), pp. 1635–1641. doi: 10.1016/j.jiph.2021.09.018.         | Singlecountry non-modelling         |
| 13 | Nogués, X. et al. (2021)      | Nogués, X. et al. (2021) 'Hospital-at-Home Expands Hospital Capacity During COVID-19 Pandemic.', <i>Journal of the American Medical Directors Association</i> , 22(5), pp. 939–942. doi: 10.1016/j.jamda.2021.01.077.                                   | Singlecountry non-modelling         |
| 14 | Kim, S. W. et al. (2020)      | Kim, S. W. et al. (2020) 'A Brief Telephone Severity Scoring System and Therapeutic Living Centers Solved Acute Hospital-Bed Shortage during the COVID-19 Outbreak in Daegu, Korea.', <i>Journal of Korean medical science</i> , 35(15), pp. e152–e152. | Singlecountry non-modelling         |
| 15 | Chen, Y. et al. (2020)        | Chen, Y. et al. (2020) 'Emergency reconstruction of large general hospital under the perspective of new COVID-19 prevention and control', <i>Wiener Klinische Wochenschrift</i> , 132(21), pp. 677–684.                                                 | Singlecountry non-modelling         |
| 16 | Witcher, T. R. (2020)         | Witcher, T. R. (2020) 'Swift Support', <i>Civil Engineering Magazine Archive</i> , pp. 76–79. doi: 10.1061/ciegag.0001494.                                                                                                                              | Singlecountry non-modelling         |
| 17 | Van Goethem, N. et al. (2020) | Van Goethem, N. et al. (2020) 'Rapid establishment of a national surveillance of COVID-19 hospitalizations in Belgium.', <i>Archives of public health = Archives belges de sante publique</i> , 78(1), p. 121. doi: 10.1186/s13690-020-00505-z.         | Singlecountry non-modelling         |
| 18 | Aziz, S. et al. (2020)        | Aziz, S. et al. (2020) 'Managing ICU surge during the COVID-19 crisis: rapid guidelines', <i>Intensive Care Medicine</i> , 46(7), pp. 1303–1325. doi: 10.1007/s00134-020-06092-5.                                                                       | Country-not-specified non-modelling |
| 19 | Bamias, G. et al. (2020)      | Bamias, G. et al. (2020) 'The Greek Response to COVID-19: A True Success Story from an IBD Perspective', <i>INFLAMMATORY BOWEL DISEASES</i> , 26(8), pp. 1144–1148. doi: 10.1093/ibd/izaa143.                                                           | Singlecountry non-modelling         |
| 20 | Borgen, I. et al. (2021)      | Borgen, I. et al. (2021) 'From Hospital to Home: An Intensive Transitional Care Management Intervention for                                                                                                                                             | Singlecountry non-modelling         |

|    |                             |                                                                                                                                                                                                                                                                                                                           |                             |
|----|-----------------------------|---------------------------------------------------------------------------------------------------------------------------------------------------------------------------------------------------------------------------------------------------------------------------------------------------------------------------|-----------------------------|
|    |                             | Patients with COVID-19.', <i>Population health management</i> , 24(1), pp. 27–34. doi: 10.1089/pop.2020.0178.                                                                                                                                                                                                             |                             |
| 21 | Tan, Y. H. et al. (2021)    | Tan, Y. H. et al. (2021) 'Application of a Machine Learning Algorithms in a Wrist-Wearable Sensor for Patient Health Monitoring during Autonomous Hospital Bed Transport.', <i>Sensors (Basel, Switzerland)</i> , 21(17). doi: 10.3390/s21175711.                                                                         | Singlecountry non-modelling |
| 22 | Hron, J. D. et al. (2020)   | Hron, J. D. et al. (2020) 'Rapid Implementation of an Inpatient Telehealth Program during the COVID-19 Pandemic.', <i>Applied clinical informatics</i> , 11(3), pp. 452–459. doi: 10.1055/s-0040-1713635.                                                                                                                 | Singlecountry non-modelling |
| 23 | Luo, H. et al. (2020)       | Luo, H. et al. (2020) 'Ultra-rapid delivery of specialty field hospitals to combat COVID-19: Lessons learned from the Leishenshan Hospital project in Wuhan', <i>Automation in Construction</i> , 119. doi: 10.1016/j.autcon.2020.103345.                                                                                 | Singlecountry non-modelling |
| 24 | Perondi, B. et al. (2020)   | Perondi, B. et al. (2020) 'Setting up hospital care provision to patients with COVID-19: lessons learnt at a 2400-bed academic tertiary center in São Paulo, Brazil', <i>Brazilian Journal of Infectious Diseases</i> , 24(6), pp. 570–574. doi: 10.1016/j.bjid.2020.09.005.                                              | Singlecountry non-modelling |
| 25 | Af Ugglas, B. et al. (2020) | Af Ugglas, B. et al. (2020) 'Emergency department crowding and hospital transformation during COVID-19, a retrospective, descriptive study of a university hospital in Stockholm, Sweden.', <i>Scandinavian journal of trauma, resuscitation and emergency medicine</i> , 28(1), p. 107. doi: 10.1186/s13049-020-00799-6. | Singlecountry non-modelling |
| 26 | Raith, E. P. et al. (2021)  | Raith, E. P. et al. (2021) 'Repurposing a neurocritical care unit for the management of severely ill patients with COVID-19: A retrospective evaluation', <i>Journal of Neurosurgical Anesthesiology</i> , 33(1), pp. 77–81. doi: 10.1097/ANA.0000000000000727.                                                           | Singlecountry non-modelling |
| 27 | Brown, D. R. et al. (2020)  | Brown, D. R. et al. (2020) 'Vancouver Convention Health Centre (COVID-19 Response): Planning, implementation, and four lessons learned', <i>American journal of disaster medicine</i> , 15(2), pp. 143–148. doi: 10.5055/ajdm.2020.0365.                                                                                  | Singlecountry non-modelling |
| 28 | Kim, M. et al. (2020)       | Kim, M. et al. (2020) 'Lessons from a covid-19 hospital, republic of korea', <i>Bulletin of the World Health Organization</i> , 98(12), pp. 842–848. doi: 10.2471/BLT.20.261016.                                                                                                                                          | Singlecountry non-modelling |
| 29 | Marcon, E. et al. (2020)    | Marcon, E. et al. (2020) 'Schiavonia Hospital response to COVID-19 outbreak: a first single-center experience', <i>Annali dell'Istituto Superiore di Sanita</i> , 56(3), pp. 365–372. doi: 10.4415/ANN_20_03_15.                                                                                                          | Singlecountry non-modelling |

---

|    |                                        |                                                                                                                                                                                                                                                                           |                             |
|----|----------------------------------------|---------------------------------------------------------------------------------------------------------------------------------------------------------------------------------------------------------------------------------------------------------------------------|-----------------------------|
| 30 | Joshi, M. and Kulkarni, M. (2021)      | Joshi, M. and Kulkarni, M. (2021) 'Evaluation and Planning for a 250 Bedded COVID-19 Healthcare Infrastructure in City of Gurgaon, India', <i>Hospital topics</i> , 99(2), pp. 92–100. doi: 10.1080/00185868.2020.1859343.                                                | Singlecountry non-modelling |
| 31 | Franke, G. et al. (2021)               | Franke, G. et al. (2021) 'An automated room disinfection system using ozone is highly active against surrogates for SARS-CoV-2', <i>Journal of Hospital Infection</i> , 112, pp. 108–113. doi: 10.1016/j.jhin.2021.04.007.                                                | Singlecountry non-modelling |
| 32 | Yang, Y., Kim, H. and Hwang, J. (2020) | Yang, Y., Kim, H. and Hwang, J. (2020) 'Quarantine Facility for Patients with COVID-19 with Mild Symptoms in Korea: Experience from Eighteen Residential Treatment Centers.', <i>Journal of Korean medical science</i> , 35(49), p. e429. doi: 10.3346/jkms.2020.35.e429. | Singlecountry non-modelling |
| 33 | Christen, P. et al. (2021)             | Christen, P. et al. (2021) 'The J-IDEA Pandemic Planner: A Framework for Implementing Hospital Provision Interventions During the COVID-19 Pandemic.', <i>Medical care</i> , 59(5), pp. 371–378. doi: 10.1097/MLR.0000000000001502.                                       | Multicountry non-modelling  |
| 34 | Zhang, Y. et al. (2021)                | Zhang, Y. et al. (2021) 'Wuhan mobile cabin hospital: A critical health policy at a critical time in China', <i>Medicine</i> , 100(3), p. e24077. doi: 10.1097/MD.00000000000024077.                                                                                      | Singlecountry non-modelling |
| 35 | Chen, S. et al. (2020)                 | Chen, S. et al. (2020) 'Fangcang shelter hospitals: a novel concept for responding to public health emergencies', <i>The Lancet</i> , 395(10232), pp. 1305–1314. doi: 10.1016/S0140-6736(20)30744-3.                                                                      | Singlecountry non-modelling |
| 36 | Zhu, W. et al. (2020)                  | Zhu, W. et al. (2020) 'Establishing and Managing a Temporary Coronavirus Disease 2019 Specialty Hospital in Wuhan, China', <i>Anesthesiology</i> , 132(6), pp. 1339–1345. doi: 10.1097/ALN.0000000000003299.                                                              | Singlecountry non-modelling |
| 37 | Cai, Y. et al. (2020)                  | Cai, Y. et al. (2020) 'The effects of "Fangcang, Huoshenshan, and Leishenshan" hospitals and environmental factors on the mortality of COVID-19', <i>PeerJ</i> , 8, p. e9578.                                                                                             | Singlecountry non-modelling |
| 38 | Barasa, E. et al. (2020)               | Barasa, E. W., Ouma, P. O. and Okiro, E. A. (2020) 'Assessing the hospital surge capacity of the Kenyan health system in the face of the COVID-19 pandemic.', <i>PloS one</i> , 15(7), p. e0236308. doi: 10.1371/journal.pone.0236308.                                    | Singlecountry non-modelling |
| 39 | Poeran, J. et al. (2020)               | Poeran, J. et al. (2020) 'Cancellation of Elective Surgery and Intensive Care Unit Capacity in New York State: A Retrospective Cohort Analysis.', <i>Anesthesia and analgesia</i> , 131(5), pp. 1337–1341. doi: 10.1213/ANE.0000000000005083.                             | Singlecountry non-modelling |



|    |                                                  |                                                                                                                                                                                                                                                                                                            |                            |
|----|--------------------------------------------------|------------------------------------------------------------------------------------------------------------------------------------------------------------------------------------------------------------------------------------------------------------------------------------------------------------|----------------------------|
| 40 | Winkelmann, J. et al.(2022)                      | Winkelmann, J., Webb, E., Williams, G. A., Hernández-Quevedo, C., Maier, C. B., & Panteli, D. (2022). European countries' responses in ensuring sufficient physical infrastructure and workforce capacity during the first COVID-19 wave. <i>Health Policy</i> , 126(5), 362-372.                          | Multicountry non-modelling |
| 41 | López-Cheda, A. et al. (2021)                    | López-Cheda, A. et al. (2021) 'Estimating lengths-of-stay of hospitalized COVID-19 patients using a non-parametric model: A case study in Galicia (Spain)', <i>Epidemiology and Infection</i> . doi: 10.1017/S0950268821000959.                                                                            | Singlecountry modelling    |
| 42 | Bentout, S. et al. (2021)                        | Bentout, S. et al. (2021) 'Age-Structured Modeling of COVID-19 Epidemic in the USA, UAE and Algeria', <i>Alexandria Engineering Journal</i> , 60(1), pp. 401–411. doi: 10.1016/j.aej.2020.08.053.                                                                                                          | Multicountry modelling     |
| 43 | Rivera-Rodriguez, C. and Urdinola, B. P. (2020°) | Rivera-Rodriguez, C. and Urdinola, B. P. (2020) 'Predicting Hospital Demand During the COVID-19 Outbreak in Bogotá, Colombia', <i>Frontiers in Public Health</i> , 8. doi: 10.3389/fpubh.2020.582706.                                                                                                      | Singlecountry modelling    |
| 44 | Gitto, S. et al. (2021)                          | Gitto, S. et al. (2021) 'Forecasting national and regional level intensive care unit bed demand during COVID-19: The case of Italy.', <i>PloS one</i> , 16(2), p. e0247726. doi: 10.1371/journal.pone.0247726.                                                                                             | Singlecountry modelling    |
| 45 | Zhao, Ch. et al. (2020)                          | Zhao, Ch. et al. (2020) 'icumonitoring.ch: a platform for short-term forecasting of intensive care unit occupancy during the COVID-19 epidemic in Switzerland' <i>Swiss Medical Weekly</i> 150, doi: 10.4414/smw.2020.20277                                                                                | Singlecountry modelling    |
| 46 | Capistran, M. et al. (2021)                      | Capistran, M. et al. (2021) 'Forecasting hospital demand in metropolitan areas during the current COVID-19 pandemic and estimates of lockdown-induced 2nd waves ' <i>PLoS ONE</i> 16(1): e0245669. <a href="https://doi.org/10.1371/journal.pone.0245669">https://doi.org/10.1371/journal.pone.0245669</a> | Singlecountry modelling    |
| 47 | T. Mokhele et al. (2021)                         | T. Mokhele et al. (2021) 'Spatial analysis of perceived health system capability and actual health system capacity for covid-19 in south africa' <i>Open Public Health J.</i> , vol. 14, no. 1, pp. 388–398, 2021, doi: 10.2174/1874944502114010388.                                                       | Singlecountry modelling    |
| 48 | Moss, R. et al. (2020)                           | Moss, R. et al. (2020) 'Coronavirus Disease Model to Inform Transmission-Reducing Measures and Health System Preparedness, Australia' <a href="https://doi.org/10.3201/eid2612.202530">doi.org/10.3201/eid2612.202530</a>                                                                                  | Singlecountry modelling    |
| 49 | Tembine H. (2020)                                | Tembine H. (2020) 'COVID-19: Data-Driven Mean-Field-Type Game Perspective' <i>Games</i> 2020, 11, 51; doi:10.3390/g11040051                                                                                                                                                                                | Multicountry modelling     |

---

|    |                                                 |                                                                                                                                                                                                                                                                        |                         |
|----|-------------------------------------------------|------------------------------------------------------------------------------------------------------------------------------------------------------------------------------------------------------------------------------------------------------------------------|-------------------------|
| 50 | Gel, ES., et al. (2020)                         | Gel, ES., et al. (2020) 'COVID-19 healthcare demand projections: Arizona' PLoS ONE 15(12): e0242588. <a href="https://doi.org/10.1371/journal.pone.0242588">https://doi.org/10.1371/journal.pone.0242588</a>                                                           | Singlecountry modelling |
| 51 | Bayraktar Y., et al. (2020)                     | Bayraktar Y., et al. (2020) 'Role of the Health System in Combating Covid-19: Cross-Section Analysis and Artificial Neural Network Simulation for 124 Country Cases' <a href="https://doi.org/10.1080/19371918.2020.1856750">doi.org/10.1080/19371918.2020.1856750</a> | Multicountry modelling  |
| 52 | Wells, C. M. et al (2021)                       | Wells, C. M. et al (2021) 'Tiered model of nurse staffing for critical care and emergency departments in the wake of a pandemic,' J. Nurs. Adm., vol. 51, no. 2, pp. E1–E5, 2021, doi: 10.1097/NNA.0000000000000979.                                                   | Singlecountry modelling |
| 53 | Gambos, K., et al (2021).                       | Gambos, K., et al (2021). 'Translating Scientific Knowledge to Government Decision Makers Has Crucial Importance in the Management of the COVID-19 Pandemic' DOI: 10.1089/pop.2020.0159                                                                                | Singlecountry modelling |
| 54 | Bhowmik T., et al. (2021)                       | Bhowmik T., et al. (2021) 'A comprehensive county level model to identify factors affecting hospital capacity and predict future hospital demand' <a href="https://doi.org/10.1038/s41598-021-02376-y">doi.org/10.1038/s41598-021-02376-y</a>                          | Singlecountry modelling |
| 55 | Stern, R. H. (2020)                             | Stern, R. H. (2020) 'Locally Informed Simulation to Predict Hospital Capacity Needs During the COVID-19 Pandemic.', Annals of internal medicine. United States, pp. 679–680. doi: 10.7326/L20-1061.                                                                    | Singlecountry modelling |
| 56 | Smith, D. R. M. et al. (2020)                   | Smith, D. R. M. et al. (2020) 'Optimizing COVID-19 surveillance in long-term care facilities: a modelling study', BMC Medicine, 18(1). doi: 10.1186/s12916-020-01866-6.                                                                                                | Singlecountry modelling |
| 57 | Qian, Z. et al. (2021)                          | Qian, Z., Alaa, A. M. and van der Schaar, M. (2021) 'CPAS: the UK's national machine learning-based hospital capacity planning system for COVID-19', Machine Learning, 110(1), pp. 15–35. doi: 10.1007/s10994-020-05921-4.                                             | Singlecountry modelling |
| 58 | de Barros Braga, M. et al. (2021)               | de Barros Braga, M. et al. (2021) 'Artificial neural networks for short-term forecasting of cases, deaths, and hospital beds occupancy in the COVID-19 pandemic at the Brazilian Amazon', PLoS ONE, 16(3 March), p. e0248161. doi: 10.1371/journal.pone.0248161.       | Singlecountry modelling |
| 59 | Guzzi, P. H., Tradigo, G. and Veltri, P. (2020) | Guzzi, P. H., Tradigo, G. and Veltri, P. (2020) 'Spatio-temporal resource mapping for intensive care units at regional level for COVID-19 emergency in Italy', International Journal of Environmental Research and Public Health, 17(10). doi: 10.3390/ijerph17103344. | Singlecountry modelling |

|    |                                           |                                                                                                                                                                                                                                                                                                                                                                                                                         |                         |
|----|-------------------------------------------|-------------------------------------------------------------------------------------------------------------------------------------------------------------------------------------------------------------------------------------------------------------------------------------------------------------------------------------------------------------------------------------------------------------------------|-------------------------|
| 60 | Salles Neto, L. L. et al. (2020)          | Salles Neto, L. L. et al. (2020) 'Forecast UTI: application for predicting intensive care unit beds in the context of the COVID-19 pandemic   Forecast UTI: aplicativo para previsão de leitos de unidades de terapia intensiva no contexto da pandemia de COVID-19', <i>Epidemiologia e serviços de saúde: revista do Sistema Único de Saúde do Brasil</i> , 29(4), p. e2020391. doi: 10.5123/S1679-49742020000400023. | Singlecountry modelling |
| 61 | Barrett, K. et al. (2020)                 | Barrett, K. et al. (2020) 'Estimation of COVID-19-induced depletion of hospital resources in Ontario, Canada.', <i>CMAJ: Canadian Medical Association journal = journal de l'Association medicale canadienne</i> , 192(24), pp. E640–E646. doi: 10.1503/cmaj.200715                                                                                                                                                     | Singlecountry modelling |
| 62 | Iragorri, N. et al. (2020)                | Iragorri, N. et al. (2020) 'Covid-19: Adaptation of a model to predict healthcare resource needs in valle del Cauca, Colombia [Covid-19: Adaptación de un modelo para predecir las necesidades de recursos de salud en el valle del cauca, Colombia]', <i>Colombia Medica</i> , 51(3), pp. 1–12. doi: 10.25100/cm.v51i3.e4534.                                                                                          | Singlecountry modelling |
| 63 | Akakba, A. and Lahmar, B. (2020)          | Akakba, A. and Lahmar, B. (2020) 'The use of Geocoding for Home Healthcare Application and Management an Epidemic Situation. Case of COVID-19 Virus Outbreak', <i>Geographica Pannonica</i> , 24(4), pp. 285–293. doi: 10.5937/GP24-28062.                                                                                                                                                                              | Singlecountry modelling |
| 64 | Presanis, A. M. et al. (2021)             | Presanis, A. M. et al. (2021) 'Risk factors associated with severe hospital burden of COVID-19 disease in Regione Lombardia: a cohort study', <i>BMC Infectious Diseases</i> , 21(1). doi: 10.1186/s12879-021-06750-z.                                                                                                                                                                                                  | Singlecountry modelling |
| 63 | Calabuig, J. M. et al. (2021)             | Calabuig, J. M. et al. (2021) 'Modeling hospital resource management during the covid-19 pandemic: An experimental validation', <i>Econometrics</i> , 9(4). doi: 10.3390/econometrics9040038.                                                                                                                                                                                                                           | Singlecountry modelling |
| 66 | Faes, C., Hens, N. and Gilbert, M. (2021) | Faes, C., Hens, N. and Gilbert, M. (2021) 'On the timing of interventions to preserve hospital capacity: lessons to be learned from the Belgian SARS-CoV-2 pandemic in 2020.', <i>Archives of public health = Archives belges de sante publique</i> , p. 164. doi: 10.1186/s13690-021-00685-2.                                                                                                                          | Singlecountry modelling |
| 67 | Weissman, G. et al. (2020)                | Weissman, G. et al. (2020) 'Locally Informed Simulation to Predict Hospital Capacity Needs During the COVID-19 Pandemic.', <i>Ann Intern Med.</i> 2020;173:21-28. doi:10.7326/M20-1260                                                                                                                                                                                                                                  | Singlecountry modelling |
| 68 | Martin, C. et al. (2021)                  | Martin, C. et al. (2021) 'Construction of a demand and capacity model for intensive care and hospital ward                                                                                                                                                                                                                                                                                                              | Singlecountry modelling |

|    |                               |                                                                                                                                                                                                                                                                                            |                         |
|----|-------------------------------|--------------------------------------------------------------------------------------------------------------------------------------------------------------------------------------------------------------------------------------------------------------------------------------------|-------------------------|
|    |                               | beds, and mortality from COVID-19.' BMC Medical Informatics and Decision Making                                                                                                                                                                                                            |                         |
| 69 | Berta, P. et al. (2020)       | Berta, P. et al. (2020) 'A bivariate prediction approach for adapting the health care system response to the spread of COVID-19' PLoS ONE 15(10): e024015                                                                                                                                  | Multicountry modelling  |
| 70 | Lorenzen, S. et al. (2021)    | Lorenzen, S. et al. (2021) 'Using machine learning for predicting intensive care unit resource use during the COVID-19 pandemic in Denmark' Nature - Scientific Reports doi./10.1038/s41598-021-98617-1                                                                                    | Singlecountry modelling |
| 71 | Shoukat, A. et al. (2020)     | Shoukat, A. et al. (2020) 'Projecting demand for critical care beds during COVID-19 outbreaks in Canada' Research Health Services, CMAJ 2020 May 11;192:E489-96. doi: 10.1503/cmaj.200457; early-released April 8, 2020                                                                    | Singlecountry modelling |
| 72 | Locey, K. et al. (2020)       | Locey, K. et al. (2020) 'An interactive tool to forecast US hospital needs in the coronavirus 2019 pandemic' JAMIA Open, 3(4), 2020, 506–512<br>doi: 10.1093/jamiaopen/ooaa045                                                                                                             | Singlecountry modelling |
| 73 | Bhandari, S. et al. (2020)    | Bhandari, S. et al. (2020) 'Patient Flow Dynamics in Hospital Systems During Times of COVID-19: Cox Proportional Hazard Regression Analysis.' Front. Public Health 8:585850.doi: 10.3389/fpubh.2020.585850                                                                                 | Singlecountry modelling |
| 74 | McCabe, R. et al.(2021)       | McCabe, R. et al. (2020/2021) 'Modelling intensive care unit capacity under different epidemiological scenarios of the COVID-19 pandemic in three Western European countries' International Journal of Epidemiology, 2021, 753–767<br>doi: 10.1093/ije/dyab034                             | Multicountry modelling  |
| 75 | W. Knafo (2020)               | W. Knafo, "COVID-19: Monitoring the propagation of the first waves of the pandemic," 4Open, vol. 3, p. 5, 2020, doi: 10.1051/fopen/202000                                                                                                                                                  | Singlecountry modelling |
| 76 | Endres-Dighe S et al. (2021)  | Endres-Dighe S et al. (2021) 'Lessons learned from the rapid development of a statewide simulation model for predicting COVID-19's impact on healthcare resources and capacity ' PLoS One. 2021 Nov 18;16(11):e0260310.doi: 10.1371/journal.pone.0260310. eCollection 2021.                | Singlecountry modelling |
| 77 | Aborujilah, A., et al. (2021) | Aborujilah, A., Elsebaie, A.-E. F. M. and Mokhtar, S. A. (2021) 'IoT MEMS: IoT-Based Paradigm for Medical Equipment Management Systems of ICUs in Light of COVID-19 Outbreak.', IEEE access: practical innovations, open solutions, 9, pp. 131120–131133. doi: 10.1109/ACCESS.2021.3069255 | Singlecountry modelling |
| 78 | Fort D et al. (2020)          | Fort D et al. (2020) 'Locally Informed Modeling to Predict Hospital and Intensive Care Unit Capacity During the                                                                                                                                                                            | Singlecountry modelling |

|    |                            |                                                                                                                                                                                                                                                                                                        |                         |
|----|----------------------------|--------------------------------------------------------------------------------------------------------------------------------------------------------------------------------------------------------------------------------------------------------------------------------------------------------|-------------------------|
|    |                            | COVID-19 Epidemic 'Ochsner J. 2020 Fall; 20(3): 285–292. Published online Fall 2020. doi: 10.31486/toj.20.0073                                                                                                                                                                                         |                         |
| 79 | Ebinger J et al. (2021)    | Ebinger J et al. (2021) 'A Machine Learning Algorithm Predicts Duration of hospitalization in COVID-19 patients' <i>Intell Based Med.</i> 2021; 5: 100035. Published online 2021 May 27. doi: 10.1016/j.ibmed.2021.100035                                                                              | Singlecountry modelling |
| 80 | Verelst F. et al. (2020)   | Verelst F. et al. (2020) 'Indications for healthcare surge capacity in European countries facing an exponential increase in coronavirus disease (COVID-19) cases, March 2020' <i>Euro Surveill.</i> 2020 Apr;25(13):2000323. doi: 10.2807/1560-7917.ES.2020.25.13.2000323.                             | Multicountry modelling  |
| 81 | Li S. et al. (2020)        | Li S. et al. (2020) 'Preliminary Assessment of the COVID-19 Outbreak Using 3-Staged Model e-ISHR'. <i>Shanghai Jiao Tong Univ. (Sci.)</i> , 2020, 25(2): 157-164                                                                                                                                       | Singlecountry modelling |
| 82 | Beker R. et al. (2022)     | Beker R. et al. (2022) 'Modeling COVID-19 hospital admissions and occupancy in the Netherlands' <i>Eur J Oper Res.</i> 2022 Jan 5. doi: 10.1016/j.ejor.2021.12.044.                                                                                                                                    | Singlecountry modelling |
| 83 | Wood R. et al. (2020)      | Wood R. et al. (2020) 'COVID-19 scenario modelling for the mitigation of capacity-dependent deaths in intensive care ' <i>Health Care Manag Sci.</i> 2020 Sep;23(3):315-324. doi: 10.1007/s10729-020-09511-7.                                                                                          | Singlecountry modelling |
| 84 | Zhou W. et al. (2020)      | Zhou W. et al. (2020) 'Impact of Hospital Bed Shortages on the Containment of COVID-19 in Wuhan' <i>Int. J. Environ. Res. Public Health</i> 2020, 17, 8560; doi:10.3390/ijerph17228560                                                                                                                 | Singlecountry modelling |
| 85 | Alqahtani F. et al. (2021) | Alqahtani F. et al. (2021) 'Bed Surge Capacity in Saudi Hospitals During the COVID-19 Pandemic' <i>Disaster Med Public Health Prep.</i> 2021 Apr 19;1-7. doi: 10.1017/dmp.2021.117.                                                                                                                    | Singlecountry modelling |
| 86 | Mishra S. et al. (2020)    | Mishra S. et al. (2020) 'Estimated surge in hospital and intensive care admission because of the coronavirus disease 2019 pandemic in the Greater Toronto Area, Canada: a mathematical modelling study' <i>CMAJ Open.</i> 2020 Sep 22;8(3):E593-E604. doi: 10.9778/cmajo.20200093. Print Jul-Sep 2020. | Singlecountry modelling |
| 87 | McCabe R et al. (2021)     | McCabe R et al. (2021) 'Modelling intensive care unit capacity under different epidemiological scenarios of the COVID-19 pandemic in three Western European countries' <i>International Journal of Epidemiology</i> , 2021, 753–767 doi: 10.1093/ije/dyab034                                           | Multicountry modelling  |
| 88 | Chowdhury R et al. (2020)  | Chowdhury R et al. (2020) 'Dynamic interventions to control COVID-19 pandemic: a multivariate prediction                                                                                                                                                                                               | Multicountry modelling  |

|    |                                     |                                                                                                                                                                                                                                                                                            |                                    |
|----|-------------------------------------|--------------------------------------------------------------------------------------------------------------------------------------------------------------------------------------------------------------------------------------------------------------------------------------------|------------------------------------|
|    |                                     | modelling study comparing 16 worldwide countries'<br>European Journal of Epidemiology (2020) 35:389–399<br><a href="https://doi.org/10.1007/s10654-020-00649-w">https://doi.org/10.1007/s10654-020-00649-w</a>                                                                             |                                    |
| 89 | Deschepper M et al. (2021)          | Deschepper M et al. (2021) 'Prediction of hospital bed capacity during the COVID- 19 pandemic' BMC Health Serv Res. 2021 May 18;21(1):468.doi: 10.1186/s12913-021-06492-3                                                                                                                  | Singlecountry modelling            |
| 90 | Chin V et al. (2020)                | Chin V et al. (2020) 'A case study in model failure? COVID-19 daily deaths and ICU bed utilisation predictions in New York state'European Journal of Epidemiology (2020) 35:733–742<br><a href="https://doi.org/10.1007/s10654-020-00669-6">https://doi.org/10.1007/s10654-020-00669-6</a> | Singlecountry modelling            |
| 91 | Goic M et al. (2021)                | Goic M et al. (2021) COVID-19: Short-term forecast of ICU beds in times of crisis ' PLoS One. 2021 Jan 13;16(1):e0245272.doi: 10.1371/journal.pone.0245272. eCollection 2021.                                                                                                              | Singlecountry modelling            |
| 92 | Alqahtani R. T. (2021)              | Alqahtani, R. T. (2021) 'Mathematical model of SIR epidemic system (COVID-19) with fractional derivative: stability and numerical analysis.' Adv. Differ. equations, vol. 2021, no. 1, p. 2, 2021, doi: 10.1186/s13662-020-03192-w.                                                        | Singlecountry modelling            |
| 93 | Baas S. et al. (2021)               | Baas S. et al. (2021) 'Real-time forecasting of COVID-19 bed occupancy in wards and Intensive Care Units'Health Care Manag Sci. 2021 Jun;24(2):402-419.doi: 10.1007/s10729-021-09553-5. Epub 2021 Mar 25.                                                                                  | Singlecountry modelling            |
| 94 | Cheng FY et al. (2020)              | Cheng FY et al. (2020)'Using Machine Learning to Predict ICU Transfer in Hospitalized COVID-19 Patients' J Clin Med. 2020 Jun 1;9(6):1668.doi: 10.3390/jcm9061668.                                                                                                                         | Singlecountry modelling            |
| 95 | Manca D et al. (2020)               | Manca D et al. (2020)'A simplified math approach to predict ICU beds and mortality rate for hospital emergency planning under Covid-19 pandemic' Comput Chem Eng. 2020 Sep 2;140:106945.doi: 10.1016/j.compchemeng.2020.106945. Epub 2020 Jun 4.                                           | Singlecountry modelling            |
| 96 | I. COVID and C. J. L. Murray (2020) | I. COVID and C. J. L. Murray, "Forecasting the impact of the first wave of the COVID-19 pandemic on hospital demand and deaths for the USA and European Economic Area countries," MedRxiv, vol. 1, pp. 1–26, 2020.                                                                         | Multicountry modelling             |
| 97 | Vekaria, B. et al. (2021)           | Vekaria, B. et al. (2021) 'Hospital length of stay for COVID-19 patients: Data-driven methods for forward planning.', BMC infectious diseases, 21(1), p. 700. doi: 10.1186/s12879-021-06371-6.                                                                                             | Singlecountry modelling            |
| 98 | Rees, E. M. et al. (2020)           | Rees, E. M. et al. (2020) 'COVID-19 length of hospital stay: a systematic review and data synthesis.', BMC medicine, 18(1), p. 270. doi: 10.1186/s12916-020-01726-3.                                                                                                                       | Singlecountry<br>Systematic Review |

|     |                             |                                                                                                                                                                                                                                                                                                                                                                  |                                                      |
|-----|-----------------------------|------------------------------------------------------------------------------------------------------------------------------------------------------------------------------------------------------------------------------------------------------------------------------------------------------------------------------------------------------------------|------------------------------------------------------|
| 99  | Ravaghi, H. et al. (2020)   | Ravaghi, H. et al. (2020) 'Models and methods for determining the optimal number of beds in hospitals and regions: a systematic scoping review', BMC health services research, 20(1), pp. 1–13.                                                                                                                                                                  | No-country-stated Scoping Review                     |
| 100 | Sim, S. S. et al. (2021)    | Sim, S. S. et al. (2021) 'Digital technology for amd management in the post-covid-19 new normal', Asia-Pacific Journal of Ophthalmology, 10(1), pp. 39–48.                                                                                                                                                                                                       | Singlecountry Literature Review                      |
| 101 | McCabe, R. et al. (2020)    | McCabe, R. et al. (2020) 'Adapting hospital capacity to meet changing demands during the COVID-19 pandemic.', BMC medicine, 18(1), pp. 1–12                                                                                                                                                                                                                      | Singlecountry dataset Analysis and Literature Review |
| 102 | Klein, M. et al. (2020)     | Klein, M. et al. (2020) 'COVID-19 Models for Hospital Surge Capacity Planning: A Systematic Review' Disaster Medicine and Public Health Preparednes, doi 10.1017/dmp.2020.332                                                                                                                                                                                    | Singlecountry Systematic Review                      |
| 103 | Cancino et al. (2020)       | Cancino A, Castillo C, De Wolff T, Gajardo P, Lecaros R, Munoz C, et al. Report# 4: Estimation of maximal ICU beds demand for COVID-19 outbreak in some Chilean regions and the effects of different mitigation strategies. Technical report, CMM-AM2V-CEPS, 03 2020. URL: <a href="http://covid-19.cmm.uchile.cl;2020">http://covid-19.cmm.uchile.cl;2020</a> . | Singlecountry technical report                       |
| 104 | Van de Voorde et al. (2020) | Van de Voorde C, Lefèvre M, Mistiaen P, Detollenaere J, Kohn L, Van den Heede K. Assessing the management of hospital surge capacity in the firstwave of the COVID-19 pandemic in Belgium. In: KCE reports. Brussels: Belgian Health Care Knowledge Centre (KCE); 2020.                                                                                          | Singlecountry technical report                       |
| 105 | Sagan et al. (2021)         | Sagan A, Webb A, Azzopardi-Muscat N, de la Mata I, McKee M, Figueras J (ed). Health systems resilience during COVID-19: Lessons for building back better. European Observatory on Health System and Policies, WHO, 2021                                                                                                                                          | Multicountry technical report                        |
| 106 | Rentschler et al. (2021)    | Rentschler, Jun; Klaiber, Christoph; Tariverdi, Mersedeh; Desjonqueres, Chloe; Mercadante, Jared. 2021. Frontline: Preparing Healthcare Systems for Shocks from Disasters to Pandemics. World Bank, Washington, DC. © World Bank. <a href="https://openknowledge.worldbank.org/handle/10986/35429">https://openknowledge.worldbank.org/handle/10986/35429</a>    | Multicountry technical report                        |

**Table S7. Results of five included review studies.**

| Author(s) | Publication date | Type of review | Review objective | Number of studies included | Adaptations proposed during COVID-19 | Applicability to long-term/ planning |
|-----------|------------------|----------------|------------------|----------------------------|--------------------------------------|--------------------------------------|
|-----------|------------------|----------------|------------------|----------------------------|--------------------------------------|--------------------------------------|

|                        |         |                                                                          |                                                                                                                                                                                                |    |                                                                                                                                                                                                                 |                                                                                                                                                                    |
|------------------------|---------|--------------------------------------------------------------------------|------------------------------------------------------------------------------------------------------------------------------------------------------------------------------------------------|----|-----------------------------------------------------------------------------------------------------------------------------------------------------------------------------------------------------------------|--------------------------------------------------------------------------------------------------------------------------------------------------------------------|
| Rees, E. M. et al.[15] | 2020/09 | Systematic Review                                                        | Reviewing early evidence on the length of stay (LoS) of patients with COVID-19 in hospitals and in ICUs.                                                                                       | 52 | Monitoring the distributions of total hospital and ICU LoS.                                                                                                                                                     | Important to project future demand and make early estimates of how long patients need to stay in hospitals.                                                        |
| Ravaghi, H. et al.[17] | 2020/03 | Scoping Review                                                           | Identifying and characterizing existing models and methods for determining the required number of beds at the hospital and regional levels, as well as comparing their benefits and drawbacks. | 23 | Authors suggested considering alternative approaches to planning hospital capacity, like care pathways, to fix the limitations of "bed numbers".                                                                | Decision-making about the optimal number of hospital beds at the hospital or regional levels.                                                                      |
| Sim, S. S. et al.[121] | 2021/02 | Literature Review                                                        | The review looked at how pressures created by COVID-19 in health systems and hospital infrastructures have encouraged the acceptance and speed of adoption of digitalization.                  | 15 | Implementation of artificial intelligence and "virtual clinics" in screening, diagnosis, monitoring, and treatment; home monitoring devices in self-monitoring approaches.                                      | Digitalization in healthcare delivery (in the post-COVID-19 new normal where digital platforms may be routine, standard, and expected in healthcare delivery).     |
| McCabe, R. et al.[14]  | 2020/10 | Analysis of National Health Service (NHS) datasets and Literature Review | Estimating hospital care capacity before the pandemic and quantifying the impact of interventions (cancellation of elective surgery, field hospitals, use of private hospitals,                | 37 | Cancellation of elective surgeries; set-up of field hospitals; use of private hospitals; redeployment of former healthcare staff and deployment of newly qualified and final year nursing and medical students. | Authors developed a model to quantify hospital capacity for general and acute and critical care considering three crucial resources: staff, beds, and ventilators. |



deployment of former medical staff and deployment of newly qualified medical staff) for treatment COVID-19 patients.

|                         |         |                             |                                                                                        |   |                                                                                                                                     |                                                                                             |
|-------------------------|---------|-----------------------------|----------------------------------------------------------------------------------------|---|-------------------------------------------------------------------------------------------------------------------------------------|---------------------------------------------------------------------------------------------|
| Klein, M.<br>et al.[16] | 2020/10 | System-<br>atic Re-<br>view | Highlighting the models that project both caseload and hospital capacity requirements. | 6 | Using projection models to manage hospital capacity: including length of stay (LOS), occupancy, mortality, and ventilator capacity. | Adoption of models that help with both caseload projection and hospital capacity management |
|-------------------------|---------|-----------------------------|----------------------------------------------------------------------------------------|---|-------------------------------------------------------------------------------------------------------------------------------------|---------------------------------------------------------------------------------------------|

---
